# Supplementary material
Source: HighWire-hosted journal article supplement (https://ep.bmj.com/content/101/5/232)
Supplement: inline-supplementary-material-1 [file inline-supplementary-material-1.pdf]

**Appendix 1: Fifteen Minute Consultation: Diagnosis and management of Congenital CMV multiple-choice questions.**

1. Which one of the following statements is true:

- A. Babies with congenital CMV usually have symptoms at birth
- B. Babies with no clinical evidence of disease at birth have no risk of having hearing or neurological impairment
- C. Two thirds of babies with clinical evidence of cCMV at birth will likely have some degree of neurological impairment
- D. There is a national screening programme in the United Kingdom that identifies babies with congenital CMV

2. To confirm the diagnosis of cCMV one should request (select one):

- A. Paired serology between the mother and newborn in the first week
- B. IgM to CMV in the newborn in the first 3 weeks
- C. Blood for CMV DNA in the first 3 months of life
- D. Urine or saliva for CMV DNA in the first 3 weeks of life

3. Once a diagnosis of cCMV has been confirmed recommended action includes (select all that apply):

- A. Looking for evidence of disease including a clinical examination, full blood count and liver function tests
- B. Referral to an audiologist
- C. Starting antiviral treatment regardless of symptoms

D. Always inserting a percutaneous long-line for intravenous ganciclovir

4. The treatment for cCMV (select one):

A. Is for 2 weeks with intravenous ganciclovir, during the first month of life

B. Is recommended for 6 months, ideally starting in the first month of life

C. Cannot be given orally for the entire treatment course

D. Has known short-term side effects but certainly has no long-term side effects

5. Follow up of infants with symptomatic cCMV involves (select all that apply):

A. Regular audiology follow-up at least until the child is school age

B. Ensuring the family have knowledge regarding a support group

C. Regular full blood counts during treatment, particularly after the first month of treatment as risk of neutropenia increases over time

D. Referral to a child development service

**Answers:**

1. C

2. D

3. A, B

4. B

5. A, B, D
